# Supplementary material for: Implication of a novel postoperative recovery protocol to increase day 1 discharge rate after anatomic lung resection
Source: PubMed Central journal article supplement — J Thorac Dis. 2021 Nov;13(11):6399–408. doi: 10.21037/jtd-21-965 (PMC8662496; doi:10.21037/jtd-21-965), 2021-11
Supplement: jtd-13-11-6399-dss.pdf [file jtd-13-11-6399-dss.pdf]

## Data Sharing Statement

|                     |                                                                                                                                                    |                                                                                                                                |
|---------------------|----------------------------------------------------------------------------------------------------------------------------------------------------|--------------------------------------------------------------------------------------------------------------------------------|
| <b>Article Info</b> | <a href="https://dx.doi.org/10.21037/jtd-21-965">https://dx.doi.org/10.21037/jtd-21-965</a>                                                        |                                                                                                                                |
| <b>Item</b>         | <b>Question</b>                                                                                                                                    | <b>Authors' Response<br/>(place "-" if not applicable)</b>                                                                     |
| 1                   | Would you like to share data collected for your study to others?                                                                                   | Yes, upon reasonable request.                                                                                                  |
| 2                   | If not, would you like to share the reason for your decision?                                                                                      | -                                                                                                                              |
| 3                   | What data in particular will be shared?                                                                                                            | Individual participant data that underlie the results reported in this article after deidentification.                         |
| 4                   | Any other documents will be share? Such as study protocol, statistical analysis plan, informed consent form, clinical study report, analytic code. | -                                                                                                                              |
| 5                   | When will data availability begin?                                                                                                                 | 6 months following publication.                                                                                                |
| 6                   | When will data availability end?                                                                                                                   | 36 months following publication.                                                                                               |
| 7                   | To whom will you share the data?                                                                                                                   | Investigators whose proposed use of the data has been approved by an independent review committee identified for this purpose. |
| 8                   | For what type of analysis or purpose?                                                                                                              | Related research.                                                                                                              |
| 9                   | How or where can the data/documents be obtained?                                                                                                   | Proposals may be submitted to the corresponding author.                                                                        |
| 10                  | Any other restrictions?                                                                                                                            | -                                                                                                                              |
